# Supplementary material
Source: PubMed Central journal article supplement (PMC4184456)
Supplement: pr500527c_si_001.pdf [file pr500527c_si_001.pdf]

# **Differential Ion Mobility Spectrometry Coupled to Tandem Mass Spectrometry Enables Leukemia Antigen Detection Without HPLC**

Udara Dharmasiri, Samantha L. Isenberg, Gary L. Glish, and Paul M. Armistead

## **Supporting Information:**

1. Supplementary Table S-1: Peptide pool sequences, molecular weights and predicted HLA-A\*0201 binding affinities
2. Supplementary Figure S-1: MS/MS spectra for UNC-CDK4-1 (ALTPVVVTL)
3. Supplementary Figure S-2: MS/MS spectra for UNC-ANKRD17-1 (LLIERGASL)

**Supplementary Table S-1:**

| Peptide #  | Molecular weight, g/mol | Molecular Formula                  | Predicted Binding IC <sub>50</sub> to HLA-A*0201 (nM) |
|------------|-------------------------|------------------------------------|-------------------------------------------------------|
| <b>GLR</b> | <b>1017.12</b>          | <b>H<sub>2</sub>N-FLSSANEHL-OH</b> | <b>19.00</b>                                          |
| 1          | 1114.37                 | H <sub>2</sub> N-FLVFFLESL-OH      | 10.00                                                 |
| 2          | 1146.32                 | H <sub>2</sub> N-FLKNYFTDV-OH      | 29.00                                                 |
| 3          | 1189.48                 | H <sub>2</sub> N-SLGGFLLVFFL-OH    | 20.00                                                 |
| 4          | 1022.31                 | H <sub>2</sub> N-LIISLGGFLL-OH     | 19.00                                                 |
| 5          | 1008.28                 | H <sub>2</sub> N-IISLGGFLLV-OH     | 36.00                                                 |
| 6          | 954.24                  | H <sub>2</sub> N-CILCGLSFV-OH      | 33.00                                                 |
| 7          | 1051.33                 | H <sub>2</sub> N-ILCGLSFVSL-OH     | 71.00                                                 |
| 8          | 1121.44                 | H <sub>2</sub> N-LIISLGGFLLV-OH    | 24.00                                                 |
| 9          | 1185.45                 | H <sub>2</sub> N-FLVFFLESLA-OH     | 44.00                                                 |
| 10         | 1151.43                 | H <sub>2</sub> N-ELIISLGGFLL-OH    | 262.00                                                |
| 11         | 1075.28                 | H <sub>2</sub> N-RVFKAVEQV-OH      | 167.00                                                |
| 12         | 1075.24                 | H <sub>2</sub> N-RVFQAVEQV-OH      | 164.00                                                |
| 13         | 1004.28                 | H <sub>2</sub> N-LLLPPSSFM-OH      | 143.00                                                |
| 14         | 1224.45                 | H <sub>2</sub> N-YLFTLEPQTI-OH     | 13.00                                                 |
| 15         | 1094.35                 | H <sub>2</sub> N-SLQGFVLMISI-OH    | 25.00                                                 |
| 16         | 1111.29                 | H <sub>2</sub> N-YLFTLEPQT-OH      | 33.00                                                 |
| 17         | 1101.27                 | H <sub>2</sub> N-TLYWTDCTV-OH      | 41.00                                                 |
| 18         | 1062.25                 | H <sub>2</sub> N-LILDAFEEL-OH      | 32.00                                                 |
| 19         | 965.19                  | H <sub>2</sub> N-FLGMAVNTL-OH      | 53.00                                                 |
| 20         | 1175.41                 | H <sub>2</sub> N-LLILDAFEEL-OH     | 62.00                                                 |
| 21         | 1287.48                 | H <sub>2</sub> N-WTLYWTDCTV-OH     | 131.00                                                |
| 22         | 1149.29                 | H <sub>2</sub> N-ILDAFEELEA-OH     | 110.00                                                |
| 23         | 1047.39                 | H <sub>2</sub> N-FIMAAILRI-OH      | 7.00                                                  |
| 24         | 900.10                  | H <sub>2</sub> N-SMFAVGCSV-OH      | 14.00                                                 |
| 25         | 1111.51                 | H <sub>2</sub> N-LLSLLLLMPV-OH     | 12.00                                                 |
| 26         | 1076.37                 | H <sub>2</sub> N-CLLCQPLTSV-OH     | 31.00                                                 |
| 27         | 986.22                  | H <sub>2</sub> N-CLTSLLHTV-OH      | 18.00                                                 |
| 28         | 1028.42                 | H <sub>2</sub> N-LLSLLLLM-OH       | 39.00                                                 |
| 29         | 1082.43                 | H <sub>2</sub> N-IILSFVFIM-OH      | 71.00                                                 |
| 30         | 1041.29                 | H <sub>2</sub> N-TLNIHMTLV-OH      | 84.00                                                 |
| 31         | 973.22                  | H <sub>2</sub> N-LLCQPLTSV-OH      | 52.00                                                 |
| 32         | 1156.55                 | H <sub>2</sub> N-QLLSLLLLM-OH      | 259.00                                                |
| 33         | 1052.26                 | H <sub>2</sub> N-SLPRAAEIPV-OH     | 62.00                                                 |
| 34         | 1145.47                 | H <sub>2</sub> N-SLLHTVLTMM-OH     | 83.00                                                 |
| 35         | 1203.53                 | H <sub>2</sub> N-LLMPVHPQRL-OH     | 39.00                                                 |
| 36         | 1153.51                 | H <sub>2</sub> N-IILSFVFIMA-OH     | 121.00                                                |
| 37         | 1014.27                 | H <sub>2</sub> N-SLLHTVLTM-OH      | 223.00                                                |
| 38         | 1040.35                 | H <sub>2</sub> N-ILSFVFIMA-OH      | 182.00                                                |
| 39         | 1101.32                 | H <sub>2</sub> N-TLLNTGLEKL-OH     | 122.00                                                |
| 40         | 1111.43                 | H <sub>2</sub> N-ILSFVFIMAA-OH     | 107.00                                                |

|    |         |                                 |        |
|----|---------|---------------------------------|--------|
| 41 | 1024.35 | H <sub>2</sub> N-FVFIMAAIL-OH   | 295.00 |
| 42 | 1000.21 | H <sub>2</sub> N-LLNTGLEKL-OH   | 155.00 |
| 43 | 1152.29 | H <sub>2</sub> N-FTQELEWTV-OH   | 12.00  |
| 44 | 968.22  | H <sub>2</sub> N-AVMAFDLCV-OH   | 31.00  |
| 45 | 1275.40 | H <sub>2</sub> N-QLFYFSEENV-OH  | 27.00  |
| 46 | 963.09  | H <sub>2</sub> N-AMQQQTASV-OH   | 39.00  |
| 47 | 1110.33 | H <sub>2</sub> N-TLGIQFIGYV-OH  | 114.00 |
| 48 | 1085.29 | H <sub>2</sub> N-YLAWLAFTT-OH   | 17.00  |
| 49 | 1061.25 | H <sub>2</sub> N-FTTTLNYCV-OH   | 31.00  |
| 50 | 1033.16 | H <sub>2</sub> N-GLHDHTQLL-OH   | 34.00  |
| 51 | 1186.40 | H <sub>2</sub> N-YLAWLAFTTT-OH  | 45.00  |
| 52 | 1048.20 | H <sub>2</sub> N-SAMSYDLYV-OH   | 14.00  |
| 53 | 1032.20 | H <sub>2</sub> N-AMSYDLYVA-OH   | 50.00  |
| 54 | 1159.39 | H <sub>2</sub> N-FILSAMSVDL-OH  | 27.00  |
| 55 | 1012.21 | H <sub>2</sub> N-ILSAMSVDL-OH   | 74.00  |
| 56 | 1119.28 | H <sub>2</sub> N-SAMSYDLYVA-OH  | 219.00 |
| 57 | 1145.36 | H <sub>2</sub> N-AMSYDLYVAI-OH  | 91.00  |
| 58 | 1200.55 | H <sub>2</sub> N-IMFRHVCVPV-OH  | 10.00  |
| 59 | 1132.47 | H <sub>2</sub> N-KIMFRHVCV-OH   | 105.00 |
| 60 | 977.25  | H <sub>2</sub> N-FIGSKLCPL-OH   | 24.00  |
| 61 | 1099.18 | H <sub>2</sub> N-SLPDDDLPEV-OH  | 15.00  |
| 62 | 983.23  | H <sub>2</sub> N-IMNSCVFGI-OH   | 7.00   |
| 63 | 1054.31 | H <sub>2</sub> N-AIMNSCVFGI-OH  | 16.00  |
| 64 | 1221.50 | H <sub>2</sub> N-MLQVFRDISL-OH  | 125.00 |
| 65 | 1104.32 | H <sub>2</sub> N-GLQAIDLVI-OH   | 56.00  |
| 66 | 1047.27 | H <sub>2</sub> N-LQAIDLVI-OH    | 348.00 |
| 67 | 963.21  | H <sub>2</sub> N-AMNGVIFLV-OH   | 4.00   |
| 68 | 1123.40 | H <sub>2</sub> N-PQMEIIFV-OH    | 8.00   |
| 69 | 1187.51 | H <sub>2</sub> N-MVTEFIFMGI-OH  | 98.00  |
| 70 | 1078.27 | H <sub>2</sub> N-NLLGSEPFAM-OH  | 109.00 |
| 71 | 947.07  | H <sub>2</sub> N-NLLGSEPF-A-OH  | 112.00 |
| 72 | 964.17  | H <sub>2</sub> N-LLGSEPFAM-OH   | 180.00 |
| 73 | 1168.46 | H <sub>2</sub> N-FMLLIEQSGM-OH  | 68.00  |
| 74 | 905.05  | H <sub>2</sub> N-VAADCLTNV-OH   | 161.00 |
| 75 | 992.13  | H <sub>2</sub> N-SVAADCLTNV-OH  | 87.00  |
| 76 | 1173.39 | H <sub>2</sub> N-FLGTKHNPF-I-OH | 36.00  |
| 77 | 1141.42 | H <sub>2</sub> N-LVLELKNLTV-OH  | 127.00 |
| 78 | 972.11  | H <sub>2</sub> N-VLPGSSSLNV-OH  | 139.00 |
| 79 | 926.09  | H <sub>2</sub> N-GLADLLEPV-OH   | 3.00   |
| 80 | 1045.22 | H <sub>2</sub> N-LLSDIPSST-OH   | 135.00 |
| 81 | 1052.12 | H <sub>2</sub> N-SLDEASGFNI-OH  | 42.00  |
| 82 | 1248.59 | H <sub>2</sub> N-GMFLMLFYNI-OH  | 23.00  |
| 83 | 892     | H <sub>2</sub> N-TLVESTATA-OH   | 71.00  |
| 84 | 1175.42 | H <sub>2</sub> N-KLSWFNHML-OH   | 11.00  |
| 85 | 997.21  | H <sub>2</sub> N-VLAALVESPV-OH  | 19.00  |

|    |         |                                |        |
|----|---------|--------------------------------|--------|
| 86 | 978.17  | H <sub>2</sub> N-SIYTPVVSL-OH  | 184.00 |
| 87 | 964.14  | H <sub>2</sub> N-SVSIYTPVV-OH  | 113.00 |
| 88 | 1179.50 | H <sub>2</sub> N-IMIYWDLI-OH   | 116.00 |
| 89 | 1165.47 | H <sub>2</sub> N-VIMIYWDL-OH   | 507.00 |
| 90 | 1127.24 | H <sub>2</sub> N-AVFDRYEEV-OH  | 37.00  |
| 91 | 1006.27 | H <sub>2</sub> N-ILAFYIPGL-OH  | 4.00   |
| 92 | 1105.40 | H <sub>2</sub> N-VILAFYIPGL-OH | 29.00  |
| 93 | 1130.45 | H <sub>2</sub> N-LLGYAVLRL-OH  | 20.00  |
| 94 | 1335.62 | H <sub>2</sub> N-RLRHWWVIAV-OH | 85.00  |

**Table S-1. Peptide pool sequences, molecular weights and predicted HLA-A\*0201 binding affinities.** A genomics screen was used to predict a series of potential antigens based upon their predicted binding affinity to HLA-A\*0201. Binding predictions were performed using the IEDB analysis resource ANN aka netMHC.<sup>1,2</sup> Peptides with a predicted binding affinity of < 50 nM are considered tight binders, while peptides with predicted binding affinity of between 50 and 500 nM are considered moderate binders.

**References:**

1. Lundegaard C, Lamberth K, Harndahl M, Buus S, Lund O, Nielsen M. NetMHC-3.0: accurate web accessible predictions of human, mouse and monkey MHC class I affinities for peptides of length 8-11. *Nucleic Acids Res* 2008;36:W509-12.
2. Nielsen M, Lundegaard C, Worning P, et al. Reliable prediction of T-cell epitopes using neural networks with novel sequence representations. *Protein Sci* 2003;12:1007-17.

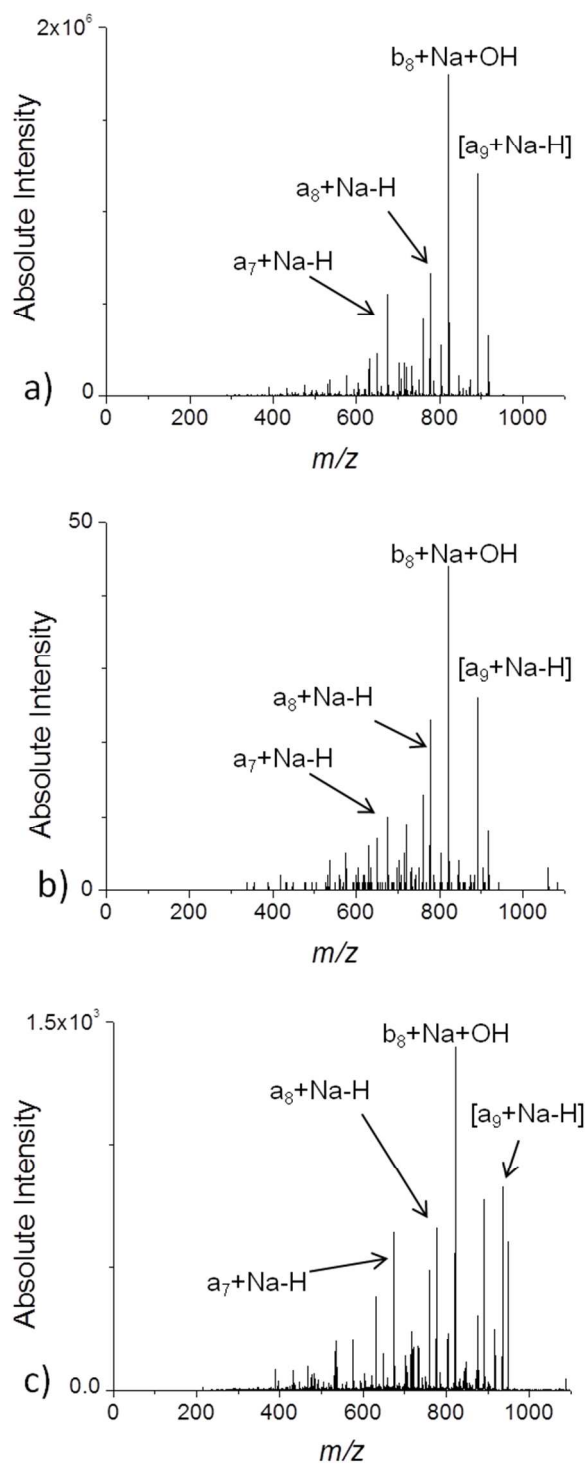

**Figure S-1. MS/MS spectra for UNC-CDK4-1 (ALTPVVVTL).** (a) was obtained for pure 10  $\mu\text{M}$  ALTPVVVTL in 50/49.9/0.1 acetonitrile/water/formic acid, (b) was obtained with DIMS active selecting for protonated ALTPVVVTL in a leukemia cell extract, and (c) was obtained without DIMS for the same leukemia cell extract.

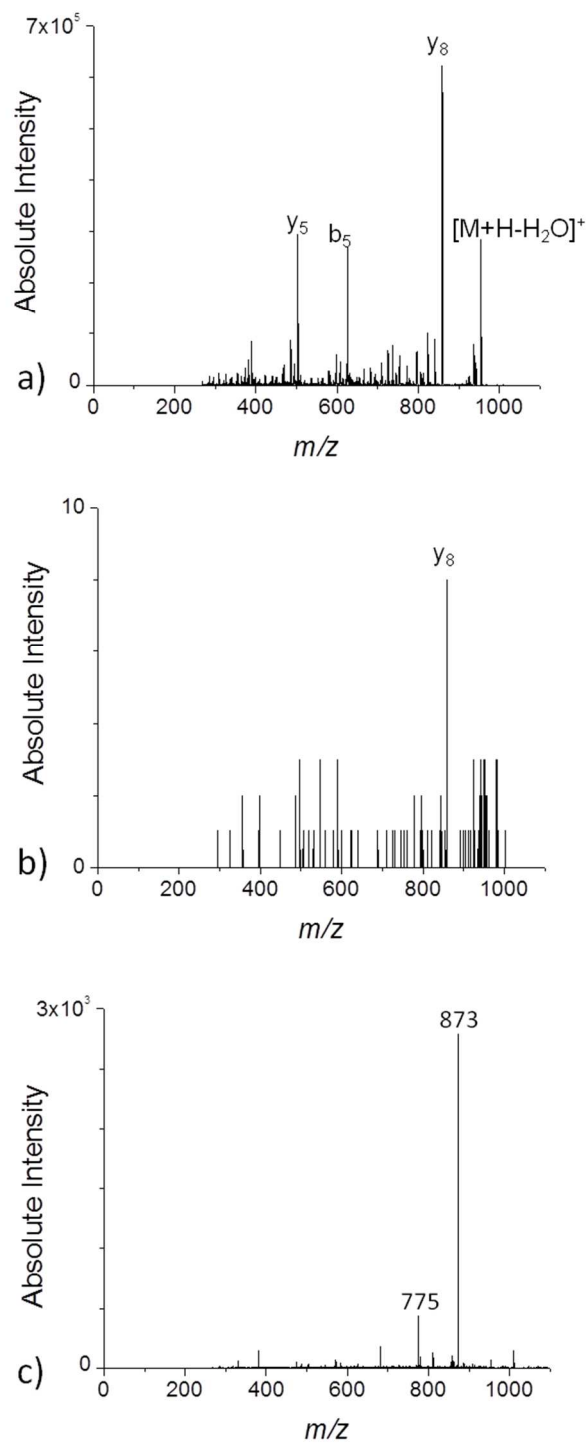

**Figure S-2. MS/MS spectra for UNC-ANKRD17-1 (LLIERGASL).** (a) was obtained for pure 10  $\mu\text{M}$  LLIERGASL in 50/49.9/0.1 acetonitrile/water/formic acid, (b) was obtained with DIMS active selecting for protonated LLIERGASL in a leukemia cell extract, and (c) was obtained without DIMS for the same leukemia cell extract.
